# Inhibition of Dual/Mixed Tropic HIV-1 Isolates by CCR5-Inhibitors in Primary Lymphocytes and Macrophages

Matteo Surdo<sup>1</sup>\*, Emanuela Balestra<sup>1</sup>\*, Patrizia Saccomandi<sup>1</sup>, Fabiola Di Santo<sup>1</sup>, Marco Montano<sup>2</sup>, Domenico Di Carlo<sup>1</sup>, Loredana Sarmati<sup>2</sup>, Stefano Aquaro<sup>3</sup>, Massimo Andreoni<sup>2</sup>, Valentina Svicher<sup>1</sup>, Carlo Federico Perno<sup>1\*</sup>, Francesca Ceccherini-Silberstein<sup>1</sup>

**1** Department of Experimental Medicine and Surgery, University of Rome Tor Vergata, Rome, Italy, **2** Clinical Infectious Diseases, Tor Vergata University (PTV), Rome, Italy, **3** Department of Pharmacology-Biology, University of Calabria, Rende (CS), Italy, 4INMI "L. Spallanzani", Rome, Italy

## Abstract

**Background:** Dual/mixed-tropic HIV-1 strains are predominant in a significant proportion of patients, though little information is available regarding their replication-capacity and susceptibility against CCR5-antagonists *in-vitro*. The aim of the study was to analyze the replication-capacity and susceptibility to maraviroc of HIV-1 clinical isolates with different tropism characteristics in primary monocyte-derived-macrophages (MDM), peripheral-blood-mononuclear-cells (PBMC), and CD4<sup>+</sup>T-lymphocytes.

**Methods:** Twenty-three HIV-1 isolates were phenotypically and genotypically characterized as R5, X4 or dual (discriminated as R5<sup>+</sup>/X4, R5/X4, R5/X4<sup>+</sup>). Phenotypic-tropism was evaluated by multiple-cycles-assay on U87MG-CD4<sup>+</sup>-CCR5<sup>+</sup>-CXCR4<sup>-</sup>-expressing cells. Genotypic-tropism prediction was obtained using Geno2Pheno-algorithm (false-positive-rate [FPR] = 10%). Replication-capacity and susceptibility to maraviroc were investigated in human-primary MDM, PBMC and CD4<sup>+</sup>T-cells. AMD3100 was used as CXCR4-inhibitor. Infectivity of R5/Dual/X4-viruses in presence/absence of maraviroc was assessed also by total HIV-DNA, quantified by real-time polymerase-chain-reaction.

**Results:** Among 23 HIV-1 clinical isolates, phenotypic-tropism-assay distinguished 4, 17 and 2 viruses with R5-tropic, dual/mixed-, and X4-tropic characteristics, respectively. Overall, viruses defined as R5<sup>+</sup>/X4-tropic were found with the highest prevalence (10/23, 43.5%). The majority of isolates efficiently replicated in both PBMC and CD4<sup>+</sup>T-cells, regardless of their tropism, while MDM mainly sustained replication of R5- or R5<sup>+</sup>/X4-tropic isolates; strong correlation between viral-replication and genotypic-FPR-values was observed in MDM ( $\rho = 0.710$ ;  $p$ -value =  $1.4e-4$ ). In all primary cells, maraviroc inhibited viral-replication of isolates not only with pure R5- but also with dual/mixed tropism (mainly R5<sup>+</sup>/X4 and, to a lesser extent R5/X4 and R5/X4<sup>+</sup>). Finally, no main differences by comparing the total HIV-DNA with the p24-production in presence/absence of maraviroc were found.

**Conclusions:** Maraviroc is effective *in-vitro* against viruses with dual-characteristics in both MDM and lymphocytes, despite the potential X4-mediated escape. This suggests that the concept of HIV-entry through one of the two coreceptors "separately" may require revision, and that the use of CCR5-antagonists in patients with dual/mixed-tropic viruses may be a therapeutic-option that deserves further investigations in different clinical settings.

**Citation:** Surdo M, Balestra E, Saccomandi P, Di Santo F, Montano M, et al. (2013) Inhibition of Dual/Mixed Tropic HIV-1 Isolates by CCR5-Inhibitors in Primary Lymphocytes and Macrophages. PLoS ONE 8(7): e68076. doi:10.1371/journal.pone.0068076

**Editor:** Michael Schindler, Helmholtz Zentrum Muenchen - German Research Center for Environmental Health, Germany

**Received:** December 21, 2012; **Accepted:** May 25, 2013; **Published:** July 9, 2013

**Copyright:** © 2013 Surdo et al. This is an open-access article distributed under the terms of the Creative Commons Attribution License, which permits unrestricted use, distribution, and reproduction in any medium, provided the original author and source are credited.

**Funding:** This work was financially supported by the European Commission Framework 7 Program (CHAIN, collaborative HIV and anti-HIV drugs Resistance Network, Integrated Project number 223131), Aviralia Foundation, National Institute of Health conv. number 40H41 and Ministry of University and Scientific Research prot. 2008MRLSNZ\_003. The funders had no role in study design, data collection and analysis, decision to publish, or preparation of the manuscript.

**Competing Interests:** CF Perno have received funds for attending symposia, speaking, organizing educational activities, grant research support, consultancy and advisory board membership, from Abbott, Boehringer Ingelheim, Bristol Myers Squibb, Gilead, Merck Sharp & Dohme, Janssen Cilag, Pfizer, Tibotec, Roche, and ViiV. F Ceccherini-Silberstein has received funds for attending symposia, speaking and organizing educational activities from Abbott, Merck Sharp & Dohme, Janssen Cilag, and ViiV. V Svicher has received funds for attending symposia, speaking and organizing educational activities from ViiV. The other authors declare that no competing interests exist. This does not alter the authors' adherence to all the PLOS ONE policies on sharing data and materials.

\* E-mail: Cf.perno@uniroma2.it

† These authors contributed equally to this work.

## Introduction

The entry of human immunodeficiency virus (HIV) into human primary cells, such as lymphocytes and macrophages, is a complex multistep process that can be targeted for antiretroviral drugs. This process needs the interaction between viral proteins and cellular receptors: in particular the first important interaction occurs

between the viral glycoprotein gp120 and the CD4 cellular receptor. In addition, other specific co-receptors, CCR5 and/or CXCR4, interact with the viral gp120 protein, inducing specific conformational changes that facilitate the viral entry into the cell mediated by the fusion protein gp41. These cellular chemokine receptors are G protein characterized by seven-transmembrane

domains and are able to determine the cellular tropism of HIV-1. Pure R5 viruses utilize only the CCR5 co-receptor to enter into target cells, while pure X4 tropic viruses utilize only the CXCR4 co-receptor [1–6]. Some viruses are able to use both coreceptors to enter into the cell, and are defined dual-tropic [7]. Recent studies highlighted the existence of different types of dual-tropic viruses: those that are more efficient in using the CCR5 co-receptor (R5<sup>+</sup>/X4), those that use more efficiently the CXCR4 co-receptor (R5/X4<sup>+</sup>), and those that can use with the same efficiency both co-receptors (R5/X4) [8]. For historical reasons, R5 viruses are often classified also as macrophage M- tropic viruses because of their propensity to infect these cells. Conversely, X4 strains are named lymphocytic T-tropic, because on their pronounced replication capacity on such type of cells [9,10].

The tropism is based upon the presence of selected amino acids in gp120 (particularly within the V3 loop, but not only) and gp41 glycoproteins, that provide greater affinity to use CCR5 or CXCR4 [11]. In the majority of patients, R5 variants predominate during the early stage of infection, but the progression of the disease is associated to an increase of the CXCR4 using virus [5,12–18]. This natural shift in viruses using also the CXCR4 coreceptor is fundamental in the emergence of dual-tropic viruses in patient's viral population, that represents approximately the 15%–25% of naïve patients and the 25%–40% of experienced patients carrying HIV-1 B subtype [12,19–22]. Conversely, the prevalence of pure X4 tropic viruses is 0.1% in naïve patients and 2–3% in treated patients, always carrying HIV-1 B subtype [12,21,23]. The viral coreceptor usage can be phenotypically determined by the approved tropism test, the Trofile assay (Monogram Biosciences) and its newer iteration, the Enhanced Sensitivity Trofile Assay (ESTA). This test is based on a single-cycle recombinant virus assay that uses pseudovirus with full-length *env*-genes from the patient's virus population to infect target cell lines engineered to express CD4 and either the CCR5 or CXCR4 chemokine co-receptor. The genotypic test, also now available for tropism determination in clinical practice, is a rapid method based on the sequence of the third variable (V3) loop of the HIV gp120. The sequence is analyzed by using bio-informatic algorithms, such as PSSM<sub>X4/R5</sub> and geno2pheno<sub>[coreceptor]</sub> (G2P) [24–27]. Furthermore, with the advent of next-generation deep sequencing, with a much higher sensitivity, today it is possible to detect minority variants of R5 and non-R5 viruses (starting from 0.1% of prevalence) also with a genotypic test [28–30].

Maraviroc is a recently Food and Drug Administration (FDA) approved antiretroviral drug with a novel mechanism of action [31,32]. It can be used for the treatment of HIV drug-naïve and drug-experienced patients, and also very important, of patients with multi-resistant viruses to other antiretroviral drugs [32–35]. It acts by binding to the CCR5 coreceptor within a cavity located among the membrane-spanning helices, and it stabilizes the receptor in a conformation not efficiently recognized by the viral gp120, thus preventing HIV-1 entry [36]. Based on this specific mechanism of action, maraviroc is recommended only in patients infected by pure R5 viruses (<http://aidsinfo.nih.gov/contentfiles/lvguidelines/adultandadolescentgl.pdf>).

So far, very few studies have focused on the *in vitro* and *in vivo* efficacy of maraviroc against HIV-1 dual-tropic viruses [28,37–39]. Similarly, very few studies also analyzed the replication capacity of HIV-1 dual-tropic viruses in human primary cells, such as CD4<sup>+</sup> T-cells and macrophages, that are the two principal targets and sanctuaries of HIV infection [40–43]. Indeed, macrophages can sustain viral infection for long periods of time, from weeks to months, *in vitro* and *in vivo* [44–49] and they can

efficiently transfer virus to CD4<sup>+</sup> T-lymphocytes contributing to their depletion in human cellular compartments [50].

It was recently recognized that R5 HIV-1 isolates can markedly vary in their replication capacity in macrophages and that some X4 viruses are also capable of replication in these cells [51].

For all of these reasons, the innovative aim of the study was to analyze both the replication capacity and the *in vitro* efficacy of maraviroc against clinical isolates with different tropic characteristics in human primary macrophages, peripheral blood mononuclear cells (PBMC) and lymphocytes. In particular, we tested the activity of entry antagonists against several dual-tropic viruses with a wide range of phenotypic and genotypic tropic preferences.

## Materials and Methods

### Cells

Human astrogloma U87MG-cells expressing CD4-receptor alone or with CXCR4 co-receptor (U87MG-CD4<sup>+</sup>/CXCR4<sup>+</sup>) or CCR5 co-receptor (U87MG-CD4<sup>+</sup>/CCR5<sup>+</sup>) were kindly obtained through the AIDS Research and Reference Reagent Program, Division of AIDS, NIAID, NIH: from Dr. Hong Kui Deng and Dr. Dan R. Littman [52]. U87MG-parental cells were obtained through the AIDS Research and Reference Reagent Program, Division of AIDS, NIAID, NIH: from Dr. Bruce Chesebro [53]. All these cells were maintained in DMEM (Euroclone) with the addition of 15% heat-inactivated, mycoplasma- and endotoxin-free fetal bovine serum (FBS) (HyClone), 1 mM sodium pyruvate (Euroclone), 0.1 mM non-essential amino acids (Euroclone), 100 U/ml penicillin +100 µg/ml streptomycin (Euroclone) and 2 mM L-glutamine (Euroclone). Medium for U87MG-CD4<sup>+</sup>, U87MG-CD4<sup>+</sup>/CXCR4<sup>+</sup> and U87MG-CD4<sup>+</sup>/CCR5<sup>+</sup> was supplemented with 300 µg/ml G418 (Sigma-Chemicals). Only for the CCR5 and CXCR4-expressing cells the medium was supplemented also with 1 µg/ml of puromycin (Sigma-Aldrich).

PBMC and Monocyte-derived Macrophages (MDM) were obtained from the blood of healthy seronegative donors by separation over Ficoll-Hypaque gradient, as previously described [54,55]. Ethic approval was deemed unnecessary because, under Italian law, biomedical research is subjected to previous approval by ethics committees only in the hypothesis of clinical trials on medicinal products for clinical use (art. 6 and art. 9, leg. decree 211/2003). Also, the research was conducted on blood samples previously anonymized, according to the requirements set by Italian Data Protection Code (leg. decree 196/2003). The research was not conducted outside of the country of residence. PBMC were seeded in T25 flask (Costar) at a density of  $1.0 \times 10^6$  cells/ml in RPMI 1640 (Euroclone) supplemented with 100 U/ml penicillin +100 µg/ml streptomycin, 2 mM L-glutamine, and 10% FBS in addition to 2 µg/ml of phytohemagglutinin (PHA, Sigma) and 50 U/ml recombinant interleukin-2 (IL-2, Peprotech).

In order to prepare MDM, PBMC were resuspended in RPMI 1640 medium supplemented with 20% FBS then seeded into 48-well plates ( $1.8 \times 10^6$  cells/well). After 5 days, non-adherent cells were carefully removed by repeated washings. MDMs were estimated to be  $10^5$ /well at the time of infection. Adherent cells obtained using this technique generally consisted of pure differentiated MDM (at cytofluorimetric analysis, more than 95% of cells were CD14<sup>+</sup>/CD4<sup>+</sup>/CD3<sup>-</sup>).

Primary CD4<sup>+</sup> T-cells were highly enriched via negative selection of PBMC using the Human CD4<sup>+</sup> T Cell enrichment kit (StemCell EasySep). The isolated CD4<sup>+</sup> T cells were seeded in T25 flask at a density of  $2.0 \times 10^6$  cells/ml in RPMI 1640 medium supplemented with 20% FBS, penicillin (100 U/ml), streptomycin (100 µg/ml) and L-glutamine (2 mM). The cells were activated

and stimulated with 50 U/ml rIL-2 and 5 µg/ml PHA for 2–3 days before infection. The purity of CD4<sup>+</sup> T-cells was evaluated through cytofluorimetric analysis (generally more than 95–98% of cells were CD4<sup>+</sup>/CD8<sup>-</sup>/CD14<sup>-</sup>/CCR5<sup>+</sup>/CXCR4<sup>+</sup>).

### Compounds

The CCR5 inhibitor maraviroc (Selzentry, MVC) and Nucleoside Reverse Transcriptase Inhibitor (NRTI) 3'-azido-2', 3'-dideoxythymidine (AZT, used as a control drug) were obtained from NIH AIDS Research and Reference Reagent Program. The CXCR4 inhibitor AMD3100 was synthesized by SIGMA.

### Viruses

Twenty-three isolates were obtained expanding primary isolates from CD8<sup>+</sup>-depleted PBMC of naïve- or HAART-experienced HIV-infected patients, as previously described [56,57]. All isolates used in the study were previously characterized for the tropism characteristics [8]. The laboratory strains HIV<sub>BaL</sub> (pure R5-tropic) and HIV<sub>IIIB</sub> (pure X4-tropic) were used as controls in all *in-vitro* experiments.

### Phenotypic-tropism

Viral tropism was evaluated by a phenotypic assay based on multiple cycles of replication in astrogloma U87MG-CD4<sup>+</sup>/CCR5<sup>+</sup> and U87MG-CD4<sup>+</sup>/CXCR4<sup>+</sup> cells [8]. Briefly, U87MG-CD4<sup>+</sup>/CCR5<sup>+</sup> and U87MG-CD4<sup>+</sup>/CXCR4<sup>+</sup> cells ( $2 \times 10^5$  cells/ml) were grown in 96-well plates in a final volume of 200 µl/well. After 24 hours, the medium was removed, and the infection was performed by using 100 µl/well of viral suspension (1,200 p24 pg/w) for 2 hours. The test was performed in quadruplicate. After 14 days of culture, the supernatants were collected and analyzed for p24 production by a commercial ELISA kit, according to the manufacturer (Ag-Genscreen TM HIV-1 Assay, BioRad).

### *In-vitro* Efficacy of Maraviroc

The antiviral activity of maraviroc was evaluated using three different concentrations: 200 nM, 20 nM and 2 nM, corresponding to 100X, 10X and 1X the IC<sub>50</sub> [31], respectively. Zidovudine (AZT) was used as a control at a concentration of 1000 nM, known to inhibit >99% the replication of laboratory strains [58], AMD3100 was used at a concentration of 1300 nM, known to inhibit >99% the replication of laboratory X4-using strain HIV<sub>IIIB</sub> [59]. Stimulated PBMC and CD4<sup>+</sup> T-cells were infected with a standardized input of each virus (16,000 p24 pg/ml/10<sup>6</sup> cells). After 2 hours of adsorption, cells were extensively washed to remove any residual viral particle, re-suspended in complete medium (1 ml) and cultured on 48-well plates (500,000 cells/well) for 7 days. All the drugs were always present in treated wells in 1 hour-pretreatment phase, during infection stage and for the 7 days later. Virus-growth was monitored at the day 7 post infection by measuring supernatant p24 levels, as described above. All assays were performed at least in duplicate wells. Each isolate was tested at least in 3 independent experiments and infected-PBMC were also kept untreated, as a control of viral replication without drug-pressure. Primary MDM were infected with a standardized input of each virus (8,000 p24 pg/ml/10<sup>5</sup> cells). After 24 hours of adsorption, cells were extensively washed to remove any residual viral particle, then new complete medium (1 ml) was added and cells were cultured for 7 days. At day 7 post infection cells were washed again and cultured for another 7 days with 1 ml of new complete medium. All the drugs were always present in treated wells in 1 hour-pretreatment phase, during infection stage and for the 14 days later. Virus-growth was monitored at the day 14 post

infection by measuring supernatant p24 levels by ELISA kit. All assays were performed in triplicate. Each isolate was tested at least in 3 independent experiments and, infected-MDM were also kept untreated to control for viral replication without drug-pressure.

### Genotypic Analysis

The V3 analysis was performed according to previous publication [8]. Briefly, HIV-1 RNA was extracted from each isolate with a commercially available kit (QIAamp RNA Viral Mini kit, Qiagen). The HIV-1 V3 sequence was amplified by two overlapping polymerase chain reactions (PCR) using two primers S2:5' CACAGTACAATGTACACA 3' and AS5:5' CTTCTC-CAATTGTCCCCTCA3'. Primers A = S2:5' CAGCACAGTA-CAATGTACACA3'; B = S5:5' GTTAAATGGCAGTCTAG-CAG3'; C = AS1:5' GAAAAATTCCCCTCCACAATT3' and D = AS3bis:5' CAATTTCTGGGTCCCCTC3' were used to sequence PCR-products in both directions on an automated sequencer (ABI3100, Applied Biosystems). Translated protein sequences from gp120-genes were generated and aligned using Bioedit 7.0 software and CLUSTALW1.8. Nucleotide V3 sequences of isolates are available as Table S1. Each V3 sequence was used to infer viral tropism using geno2pheno algorithm (available at <http://coreceptor.bioinf.mpi-inf.mpg.de/>; set at a false positive rate [FPR] of 10%) and using PSSM (available at <http://fortinbras.us/cgi-bin/fssm/fssm.pl#avg>; set at a cutoff of -5.96).

### Cell-Associated HIV-1 DNA Quantification

PBMC and MDM, infected and treated as mentioned above, were harvested, after gently washing with warm PBS, counted, dry pelleted and stored at -20°C. Total cell DNA was then extracted from cellular pellets with High Pure PCR Template Preparation Kit (Roche Molecular Biochemicals, Germany) and stored at -20°C. HIV-1 total DNA was quantified by real-time polymerase chain reaction, using 5' nuclease assay in the long terminal repeat (LTR) region of HIV-1 DNA genome (reference sequence HXB2). The reaction was performed with a LightCycler v3.5 (Roche Molecular Biochemicals, Indianapolis, IN). Briefly, up to 500 ng of DNA was amplified with the sense primer NEC 152 (GCCTCAA-TAAAGCTTGCCCTTGA) and the reverse primer NEC 131 (GGCGCCACTGCTAGAGATTTT) producing a 121 bp fragment, in the presence of a dually (FAM and TAMRA) labeled NEC LTR probe (AAGTAGTGTGTGCCCGTCTGTTRTKT-GACT) published by Jean- Paul Viard et al [60]. The first PCR cycle allowing fluorescence detection permitted to quantify HIV-1 DNA by reference to a standard curve signal (sevenfold dilutions from 75,000 to 1.87 copies of 8e5 cell DNA containing one integrated HIV-1 DNA copy per cell [60,61]) read on channel F1/F2 of the LightCycler. To verify DNA integrity, we used LC control DNA Kit reagents (Roche Molecular Biochemicals) to amplify a 110-bp fragment of human β-globine in the same reaction. This second internal control target was hybridised with a FRET probe and read on channel F3/F2 of the LightCycler. To verify the accuracy of the Real-Time PCR result, different HIV-1 DNA standards (AIDS Research and Reference Reagent Program, DAIDS, NIAID, NIH:PCR Panel 001 from Dr. Shirley Kwok and Dr. Cindy Christopherson, Roche Molecular Systems) were also quantified [60,62]. Results were expressed as number of total HIV-1 DNA copies/10<sup>6</sup> cells.

### Statistical Analysis

Comparisons of independent groups were made by Mann-Whitney-Wilcoxon (MWW) test. To correlate the replication capacity (p24 production) and genotypic tropism (values of

Geno2Pheno FPR) as well as the p24 production and HIV-DNA content, simple linear regression model and Pearson correlation test have been performed by using the statistical environment R (version 2.15.1; [63]). P-values less than 0.05 were considered statistically significant.

**Results**

**Genotypic and Phenotypic Characterization of Isolates**

Twenty-three HIV-1 isolates were phenotypically and genotypically characterized. By the phenotypic-tropism evaluation on U87MG-CD4<sup>+</sup>-CCR5<sup>+</sup> and U87MG-CD4<sup>+</sup>-CXCR4<sup>+</sup>-expressing cells, the isolates were divided into 4 pure R5-tropic viruses (17.4%), 17 dual/mixed-tropic viruses (73.9%), and only 2 X4-tropic viruses (8.7%). Among the 17 dual/mixed-isolates, 10 isolates were subsequently classified as R5<sup>+</sup>/X4, 5 isolates in R5/X4<sup>+</sup>, while 2 isolates showed a dual/mixed tropism (R5/X4) without any preference versus the chemokine coreceptors. The V3 sequence was successfully obtained for all 23 isolates. Interestingly, all 14 isolates with an R5 genotypic tropism prediction (geno2pheno FPR >10%) were phenotypically characterized either as pure R5 or R5<sup>+</sup>/X4 viruses, while the remaining isolates with a X4 genotypic prediction (FPR<10%) were all phenotypically defined as R5/X4, R5/X4<sup>+</sup> or pure X4 tropic (Table 1), thus confirming a substantial homogeneity of genotypic versus phenotypic characterization. In addition, PSSM algorithm also confirmed these results showing a concordance of 91.3% with geno2pheno algorithm (only 2 discordances in the dual/mixed viruses were observed) (data not shown).

**Viral Replication and Maraviroc Activity in PBMC**

A goal of the study was to evaluate in different human primary cells the replication capacity of these isolates, according to their tropism preferences in presence and absence of entry-inhibitors. As control, the replication capacity of HIV laboratory strains, BaL (R5) and IIIIB (X4), was also analyzed. In PBMC, both laboratory strains showed a similar p24 production at 7 days post infection, with a mean ± SD of 76,688±55,102 pg/ml versus 73,487±60,477 pg/ml, respectively. As shown in Figure 1, the majority of isolates, including dual/mixed, regardless of genotypic FPR values, efficiently replicated in PBMC (either in the range of, or more or lower than HIV-1<sub>BaL</sub> control strain). Median HIV-1 gag-p24 antigen release in PBMC supernatants at 7 days post infection (compared to HIV-1<sub>BaL</sub>) was 61.4% (34,913 pg/ml; IQR: 18,848–71,949 pg/ml). Statistical analysis showed a direct correlation between viral replication and genotypic FPR values (R<sup>2</sup> = 0.191, p-value = 0.033; rho = 0.437, p-value = 0.033).

Similar results were obtained with CD4<sup>+</sup> T-cells, where median HIV-1 gag-p24 antigen release in their supernatants at 7 days post infection (compared to HIV-1<sub>BaL</sub>) was 62.9% (50,831 pg/ml; IQR: 10,146–92,302 pg/ml; 12 isolates tested) (data not shown). Only 3 isolates (#28, #32 and #17) poorly replicated (mean value <12.2% of p24 antigen release), and this phenomenon was independent of the viral tropism.

We then tested the replication capacity of HIV isolates in PBMC in presence of maraviroc (CCR5-antagonist), or AMD3100 (CXCR4-antagonist). The NRTI AZT has been used as control drug.

All isolates responded to at least one of the two chemokine coreceptor antagonists, with a dose response modulation. Maraviroc was highly effective in PBMC (Figure 2) against all tested isolates with R5-genotypic prediction (FPR>10%, n = 6, including 3 R5<sup>+</sup>/X4), showing a median [IQR] inhibition of the viral

**Table 1.** Isolate’s genotypic and phenotypic characteristics.

| Isolate ID | Genotypic tropism <sup>a</sup> |            | Phenotypic tropism      |
|------------|--------------------------------|------------|-------------------------|
|            | FPR (%)                        | Prediction | Prediction <sup>b</sup> |
| 18         | 95.2                           | R5         | R5 <sup>+</sup> /X4     |
| 15         | 94.6                           | R5         | R5 <sup>+</sup> /X4     |
| 12         | 75.6                           | R5         | R5 <sup>+</sup> /X4     |
| 31         | 58.7                           | R5         | R5                      |
| 28         | 53.5                           | R5         | R5                      |
| 5          | 52.8                           | R5         | R5                      |
| 7          | 50.5                           | R5         | R5 <sup>+</sup> /X4     |
| 8          | 49.2                           | R5         | R5 <sup>+</sup> /X4     |
| 38         | 48.0                           | R5         | R5 <sup>+</sup> /X4     |
| 23         | 45.7                           | R5         | R5                      |
| 29         | 34.3                           | R5         | R5 <sup>+</sup> /X4     |
| 20         | 28.8                           | R5         | R5 <sup>+</sup> /X4     |
| 14         | 16.9                           | R5         | R5 <sup>+</sup> /X4     |
| 19         | 12.1                           | R5         | R5 <sup>+</sup> /X4     |
| 32         | 4.7                            | X4         | R5/X4                   |
| 4          | 2.7                            | X4         | R5/X4 <sup>+</sup>      |
| 9          | 1.8                            | X4         | R5/X4 <sup>+</sup>      |
| 1          | 1.1                            | X4         | R5/X4 <sup>+</sup>      |
| 34         | 0.7                            | X4         | R5/X4                   |
| 26         | 0.4                            | X4         | R5/X4 <sup>+</sup>      |
| 39         | 0.2                            | X4         | R5/X4 <sup>+</sup>      |
| 16         | 0.2                            | X4         | X4                      |
| 17         | 0.1                            | X4         | X4                      |

<sup>a</sup>The V3 sequence was used to infer viral tropism using geno2pheno (set at a false positive rate [FPR] of 10%) algorithms.

<sup>b</sup>Phenotypic-tropism was evaluated by multiple-cycles-assay on astrogloma U87MG-CD4<sup>+</sup>-CCR5<sup>+</sup>-CXCR4<sup>+</sup>-expressing cells.  
doi:10.1371/journal.pone.0068076.t001

replication of 99.9% [98.5–99.8] at 200 nM, 97.0% [95.1–99.2] at 20 nM, and 83% [56.7–92.3] at 2 nM.

In all these isolates, the median maraviroc IC<sub>50</sub> was ≤2 nM, and the median IC<sub>90</sub> for each isolate ranged from <2 nM to 47.2 nM. Somewhat to our surprise, the 2 R5/X4<sup>+</sup> isolates with FPR<5% (#1 and #9), tested in the study, were also inhibited by maraviroc, though less efficiently than the previous ones (median inhibition of 89.9% at 200 nM, 63.0% at 20 nM, 42.0% at 2 nM) (Figure 2). In these two isolates, maraviroc IC<sub>50</sub> was 2.2 nM and 6 nM, respectively, and the IC<sub>90</sub> was always >200 nM. As expected, maraviroc did not inhibit the replication of the pure-X4 isolate (#16). Conversely, AMD3100 at a concentration of 1300 nM was active against the pure-X4 isolate (#16), and also against the dual/mixed isolates, particularly efficient with those having FPR <5% (median [IQR] inhibition of 92.5% [85.7–96.3] (Figure 2). As expected, AMD3100 did not consistently inhibit the replication of 2 out of 3 pure-R5 isolates (inhibition activity <1%), while very poorly inhibited 1 R5-isolate (inhibition activity of 16%). As expected, AZT, used as control, inhibited all strains at the used concentration of 1000 nM.

Thus, the majority of isolates, regardless of their tropism, efficiently replicated in both PBMC and CD4<sup>+</sup> T-cells and maraviroc was active in PBMC against also dual/mixed viruses despite the potential X4-mediated escape.

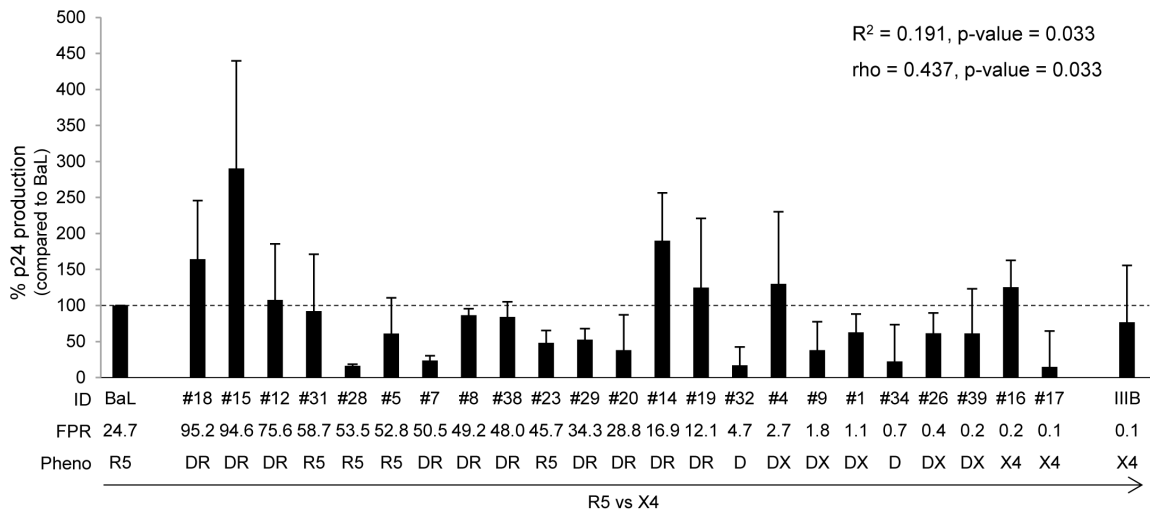

**Figure 1. Replication capacity in PBMC.** The bars represent the percentages of HIV-1 isolate replication in PBMC cultures infected with 16,000 p24 pg per 10<sup>6</sup> cells after 7 days post infection. The percentage of viral replication of each isolate is calculated considering the replication of the control virus HIV<sub>BaL</sub> as 100% (median value of 76,688 pg/ml). Mean values of at least 3 experiments for each isolate are shown. Error bars indicating inter-experimental standard deviations are shown. Linear regression model and Pearson correlation coefficient were used to determine the strength of correlation between the replication capacity (p24 production) and genotypic tropism (values of Geno2Pheno FPR). R<sup>2</sup> = Coefficient of determination; rho = Pearson correlation coefficient; p, two-tailed p value. The False Positive Rate (FPR) values are based on the V3 sequences and calculated with Geno2Pheno algorithm. The phenotypic tropism was evaluated on astrogloma U87MG-CD4<sup>+</sup>-CCR5<sup>+</sup>-/CXCR4<sup>+</sup>-expressing cells (DR: R5<sup>+</sup>X4; D: R5/X4; DX: R5/X4<sup>+</sup>). doi:10.1371/journal.pone.0068076.g001

**Viral Replication and Maraviroc Activity in MDM**

The replication capacity of isolates and control strains was also tested in MDM at 14 days post infection in presence and absence

of antiviral compounds. As expected, in MDM, the replication capacity of HIV-1<sub>BaL</sub> control strain was very efficient, producing a mean ± SD of 162,143 ± 127,019 pg/ml, while replication of

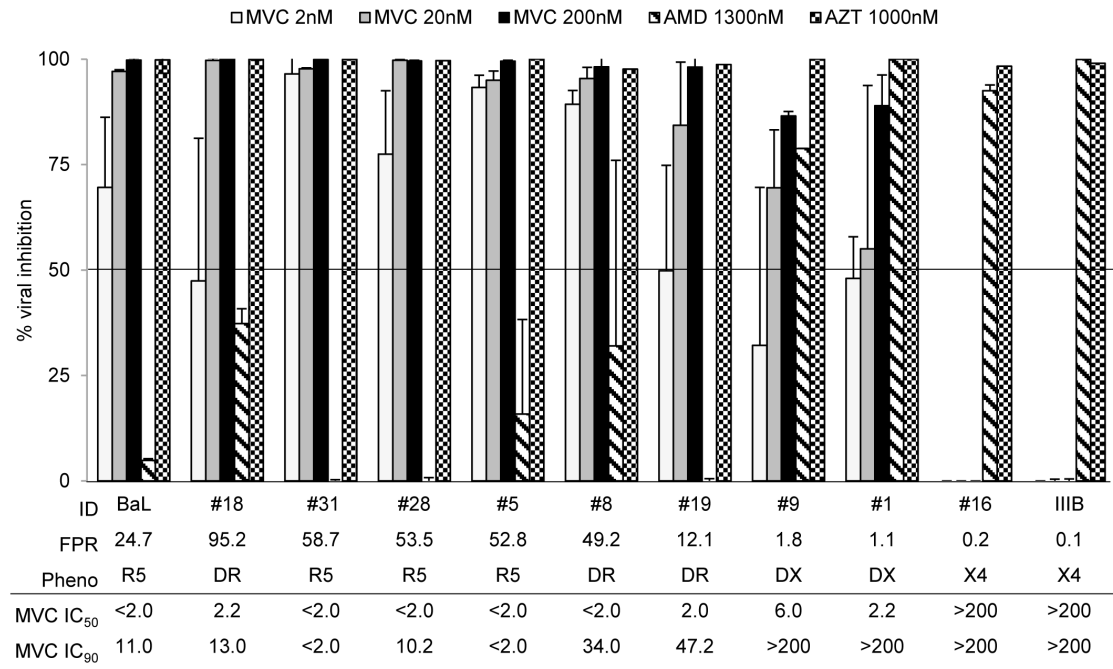

**Figure 2. Activity of Maraviroc in PBMC.** *In vitro* efficacy of Maraviroc in PBMC cultures. The histogram represents the percentage of viral inhibition (p24 production pg/ml) in presence of Maraviroc, AMD3100 and AZT at different concentrations, considering the untreated as 100. Mean values of at least 3 experiments for each isolate are shown. Error bars indicating inter-experimental standard deviations are shown. Maraviroc median IC<sub>50</sub> and IC<sub>90</sub> values of 3 different experiments are also shown. The False Positive Rate (FPR) values are based on the V3 sequences and calculated with Geno2Pheno algorithm. The phenotypic tropism was evaluated on astrogloma U87MG-CD4<sup>+</sup>-CCR5<sup>+</sup>-/CXCR4<sup>+</sup>-expressing cells (DR: R5<sup>+</sup>X4; D: R5/X4; DX: R5/X4<sup>+</sup>). doi:10.1371/journal.pone.0068076.g002

HIV-1<sub>IIB</sub> was barely detected. By statistical analysis we observed a strong and significant direct correlation between viral replication and genotypic FPR values ( $R^2 = 0.504$ ,  $p\text{-value} = 1.4 \times 10^{-4}$ ;  $\rho = 0.710$ ,  $p\text{-value} = 1.4 \times 10^{-4}$ ) (Figure 3). In particular, isolates with  $\text{FPR} > 20\%$ , phenotypically defined as pure R5- or  $\text{R5}^+/\text{X4}$ -viruses, replicated with higher efficiency compared to isolates with  $\text{FPR} < 20\%$ , (median  $p24 = 8,929$  pg/ml, IQR: 3,948–14,124 pg/ml versus 3,310 pg/ml, IQR: 2,325–5,451 pg/ml, respectively; MWW,  $p\text{-value} = 0.0156$ ), confirming that macrophages sustained mainly the replication of isolates with preferential CCR5-usage (Figure 3).

The activity of maraviroc, AMD3100 and the AZT was also analyzed in MDM (Figure 4). As observed with PBMC, maraviroc was highly effective against all tested isolates with  $\text{FPR} > 10\%$  ( $n = 5$ , including 3  $\text{R5}^+/\text{X4}$ ), showing a median [IQR] inhibition of the viral replication of 99.5% [97.8–99.9] at 200 nM, 95.3% [84.8–99.8] at 20 nM, and 52.8% [45.2–62.8] at 2 nM (Figure 4). Of interest, also the only 2 dual-tropic isolates with  $\text{FPR} < 5\%$ , 1  $\text{R5}/\text{X4}^+$  (#1) and 1  $\text{R5}/\text{X4}$  (#32), that both sufficiently replicated (median  $p24$  of 3 experiments = 2,135 pg/ml and 4,567 pg/ml, respectively) and therefore tested in MDM, were inhibited by maraviroc (median [IQR] inhibition of 90.1% [85.2–95.1] at 200 nM, 94.6% [91.9–95.1] at 20 nM, 76.6% [64.9–97.3] at 2 nM). In all tested isolates, MDM's maraviroc median  $\text{IC}_{50}$  was  $\leq 2$  nM, and the median  $\text{IC}_{90}$  ranged from 2 nM to 63.7 nM. By contrast, AMD3100 at a concentration of 1300 nM did not inhibit R5-viruses, but inhibited the replication of dual-tropic viruses at a median [IQR] of 79.4% [73.0–81.0], with a particular efficiency in the 2 dual-tropic isolates with  $\text{FPR} < 5\%$ , (Figure 4).

Taken together, these results show that macrophages mainly sustain the replication of HIV-1 isolates with pure R5 or  $\text{R5}^+/\text{X4}$  tropism, and that maraviroc is highly active against all tested isolates.

### Evaluation of HIV Total DNA Expression in Presence or Absence of Entry Inhibitors in Human Primary Cells

In order to distinguish HIV infection and viral replication, HIV-DNA of infected cells was also quantified and compared to the  $p24$  production. In PBMC cultures, no main differences were found at 7 days post infection by comparing the total HIV DNA copies with the  $p24$  production (both normalized for  $10^6$  cells) (Figure 5, panel A). Statistical analysis showed a non significant correlation between viral replication and HIV DNA values ( $R^2 = 0.125$ ,  $p\text{-value} = 0.149$ ;  $\rho = 0.354$ ,  $p\text{-value} = 0.149$ ).

The majority of isolates that replicated well also contained large amount of total HIV DNA. Isolates that replicated less efficiently were associated with a reduced amount of HIV DNA. Of interest, this rule does not apply for 3 isolates (#28, #9 and #39) that, in  $\text{T-CD4}^+$  cultures, poorly replicated ( $p24$  production at 7 days post infection  $< 12.5$  pg/ml), but reached high levels of HIV DNA copies (406,714 copies/ $10^6$  cells; 78,869 copies/ $10^6$  cells; 76,049 copies/ $10^6$  cells, respectively (Figure 5, panel B). This suggests that these isolates were able to enter within  $\text{CD4}^+$  T cells and were more inclined to produce latent infection than other isolates (where the levels of DNA and  $p24$  were more consistent). Overall, the statistical analysis showed a non significant correlation between viral replication and HIV DNA in  $\text{CD4}^+$  T cells ( $R^2 = 0.195$ ,  $p\text{-value} = 0.131$ ;  $\rho = 0.442$ ,  $p\text{-value} = 0.131$ ). Interestingly, in MDM, no significant differences were found by comparing total

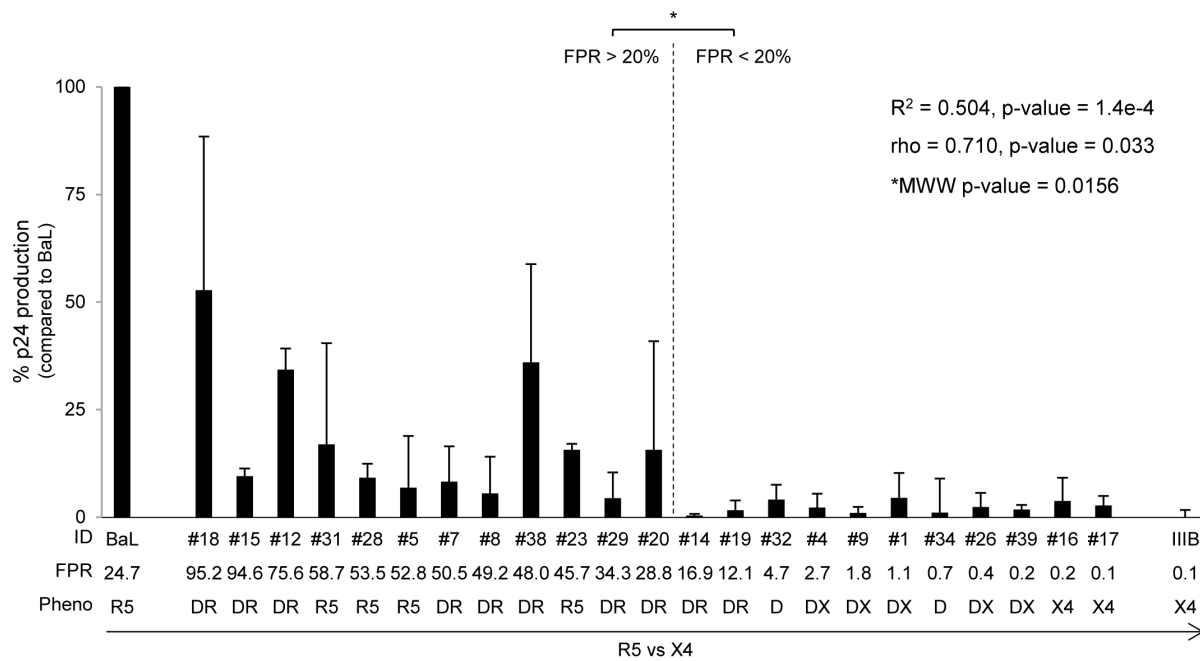

**Figure 3. Replication capacity in MDM.** The bars represent the percentages of HIV-1 isolate replication in MDM cultures infected with 8,000 pg per  $10^5$  cells after 14 days post infection. The percentage of viral replication of each isolate is calculated considering the replication of the control virus HIV<sub>BaL</sub> as 100% (median value of 162,143 pg/ml). Mean values of at least 3 experiments for each isolate are shown. Error bars indicating inter-experimental standard deviations are shown. Linear regression model and Pearson correlation coefficient were used to determine the strength of correlation between the replication capacity ( $p24$  production) and genotypic tropism (values of Geno2Pheno FPR). Mann-Whitney-Wilcoxon (MWW) test was used to compare the replication capacity between isolates with  $\text{FPR} < 20\%$  and  $> 20\%$ .  $R^2$  = Coefficient of determination;  $\rho$  = Pearson correlation coefficient;  $p$ , two-tailed  $p$  value. The False Positive Rate (FPR) values are based on the V3 sequences and calculated with Geno2Pheno algorithm. The phenotypic tropism was evaluated on astrogloma U87MG- $\text{CD4}^+$ - $\text{CCR5}^+$ -/ $\text{CXCR4}^+$ -expressing cells (DR:  $\text{R5}^+/\text{X4}$ ; D:  $\text{R5}/\text{X4}$ ; DX:  $\text{R5}/\text{X4}^+$ ). doi:10.1371/journal.pone.0068076.g003

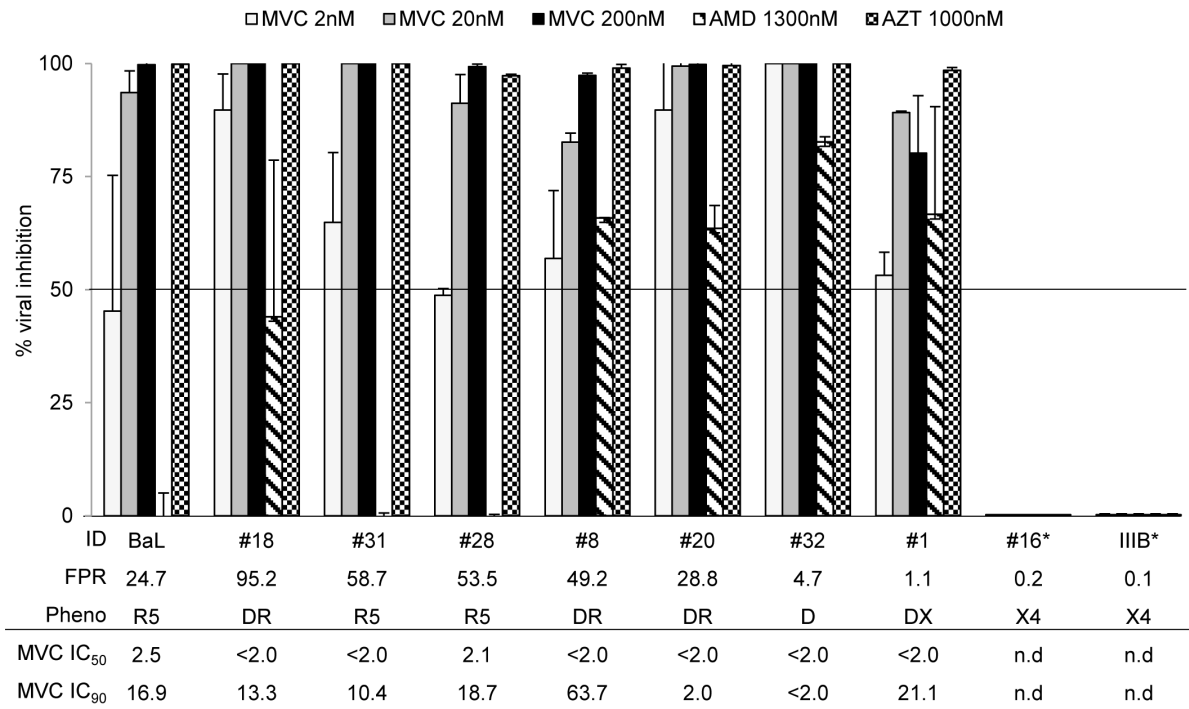

**Figure 4. Activity of Maraviroc in MDM.** *In vitro* efficacy of Maraviroc in MDM cultures. The bars represents the percentage of viral inhibition (p24 production pg/ml) in presence of Maraviroc, AMD3100 and AZT at different concentrations, considering the untreated as 100. Mean values of at least 3 experiments for each isolate are shown. Error bars indicating inter-experimental standard deviations are shown. Maraviroc median IC<sub>50</sub> and IC<sub>90</sub> values of 3 different experiments are also shown. The False Positive Rate (FPR) values are based on the V3 sequences and calculated with Geno2Pheno algorithm. The phenotypic tropism was evaluated on astrogloma U87MG-CD4<sup>+</sup>-CCR5<sup>+</sup>-/CXCR4<sup>+</sup>-expressing cells (DR: R5<sup>+</sup>X4<sup>-</sup>; D: R5<sup>+</sup>/X4<sup>+</sup>); DX: R5<sup>+</sup>/X4<sup>+</sup>). \*Antiviral activity against X4-tropic viruses (#16 and HIV<sub>IIIB</sub>) was not evaluated because due to their low replication. doi:10.1371/journal.pone.0068076.g004

HIV DNA copies with the p24 production (both normalized for 10<sup>6</sup> cells) (Figure 6, panel A), while there was a strong and significant direct correlation between viral replication and HIV DNA (R<sup>2</sup> = 0.966, p-value = 6.1e-11; rho = 0.977, p-value = 1.8e-9) (Figure 6, panel B).

As a confirmation that maraviroc inhibits both viral entry and therefore replication, in PBMC we observed that R5-isolates showed a median inhibition by maraviroc 200 nM of 99.8% for HIV DNA copies and 100% for p24 production (Figure 7). Similarly, in MDM, maraviroc 200 nM was able to completely inhibit HIV DNA copies (>99%) and p24 production (100%) in R5-isolates (data not shown).

According to p24 release, in PBMC maraviroc 200 nM was not able to well inhibit viral entry, in dual R5/X4<sup>+</sup> or HIV-1<sub>IIIB</sub> X4 tropic strains with FPR <5% (Figure 7).

Taken together, by comparing the total HIV DNA copies with the p24 production, MDM showed a strong and significant direct correlation between viral-replication and HIV-DNA, while in PBMC and CD4<sup>+</sup> T-cells the direct correlation observed was not significant. Interestingly, some isolates not replicating in CD4<sup>+</sup> T cells, where high levels of HIV DNA were observed, confirming the possibility of these cells to establish a latency phase after HIV-1 entry.

**Discussion**

This work shows that HIV-1 clinical isolates exhibit a wide range of viral tropism and different rates of replication, and highlights the ability of maraviroc to inhibit not only pure-R5 but also dual/mixed-tropic viruses in human primary cells. These

results underline the complexity and the heterogeneity of the viral population circulating in HIV-1 infected individuals, suggesting that using clinical isolates is a good model to appreciate the real viral contribution in mechanisms underlying HIV-1 pathogenesis *in vivo* (not fully appreciable when recombinant viruses are used).

We found that the majority of HIV-1 isolates efficiently replicated in PBMC and T cells. A weak correlation was observed between the efficiency of replication and viral tropism in both these cell types. In contrast, a stronger and significant correlation was observed in MDM. Consistent with higher expression of CCR5 co-receptor on their membrane, macrophages mainly sustained the replication of HIV-1 isolates with pure R5 or R5<sup>+</sup>/X4 tropism. On the other hand, the replication of all dual/mixed-tropic viruses with a genotypic FPR <20% was very poor in these cells.

Notably, in our panel of HIV-1 clinical isolates, viruses showing R5<sup>+</sup>/X4 tropism were found with higher prevalence (10/23). R5<sup>+</sup>/X4 isolates tended to replicate with comparable or even higher efficiency than isolates with pure R5 tropism. This phenomenon was more evident in macrophages, thus suggesting that dual/mixed-tropic isolates with FPR>20% can be characterized by a selective advantage compared to all other strains [64]. The efficient replication capacity of R5<sup>+</sup>/X4 isolates can have important pathogenic implications. Dual/mixed-tropic viruses emerge at later stages of infection in a significant proportion of individuals, differently from R5 viruses that predominate at earlier, asymptomatic stages of HIV-1 infection. Some studies have correlated the HIV-1 ability to replicate in macrophages with a faster disease progression [17,65–67]. For instance, isolates from individuals with advanced HIV-1 infection or AIDS display

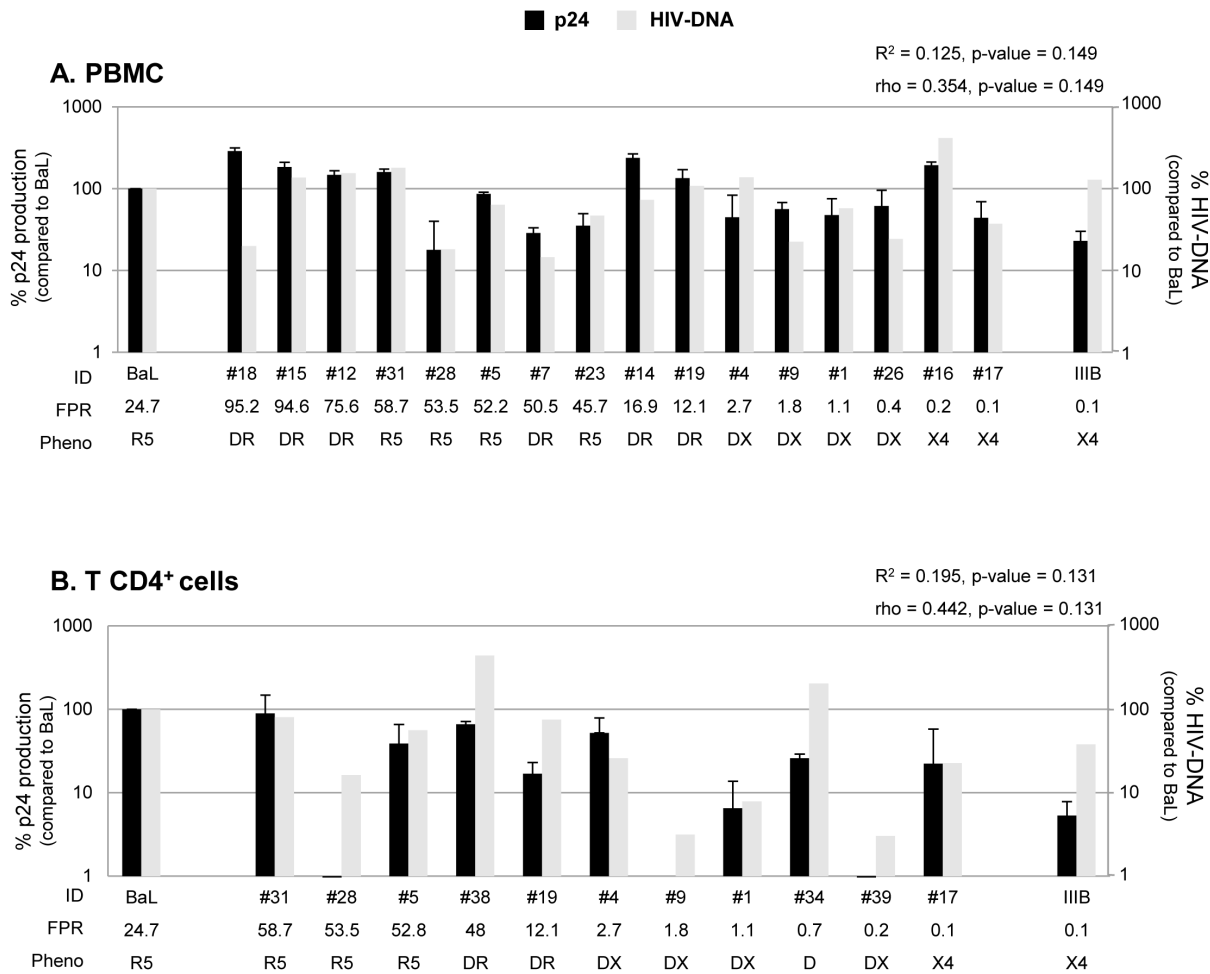

**Figure 5. Comparison of HIV-DNA and viral replication in PBMC and CD4<sup>+</sup> T-cells.** The bars represents the percentage of HIV-1 DNA copies and p24 values (normalized per 10<sup>6</sup> cells) in human primary cell types. Panel A and B: PBMC and CD4<sup>+</sup> T-cells infected with 16,000 pg per 10<sup>6</sup> cells after 7 days post infection, respectively. The percentage of p24 production and DNA copies of each isolate is calculated considering the replication of the control virus HIV<sub>BaL</sub> as 100 (in PBMC: median p24 production of 45.506 pg/10<sup>6</sup> and 555.000 HIV DNA copies/10<sup>6</sup>; in CD4<sup>+</sup> T-cells: median p24 production of 357.561 pg/10<sup>6</sup> and 2.5 × 10<sup>6</sup> HIV DNA copies/10<sup>6</sup> cells). The experiments for PBMC and CD4<sup>+</sup> T-cells were done using cells from the same donor. Mean p24 production values of 3 biological replicates for each isolate are shown. Error bars indicating intra-experimental standard deviations are shown. Linear regression model and Pearson correlation coefficient were used to determine the strength of correlation between p24 production and HIV-DNA copies. R<sup>2</sup> = Coefficient of determination; rho = Pearson correlation coefficient; p, two-tailed p value. The False Positive Rate (FPR) values are based on the V3 sequences and calculated with Geno2Pheno algorithm. The phenotypic tropism was evaluated on astrogloma U87MG-CD4<sup>+</sup>-CCR5<sup>+</sup>-/CXCR4<sup>+</sup>-expressing cells (DR: R5<sup>+</sup>X4; D: R5/X4; DX: R5/X4<sup>+</sup>). doi:10.1371/journal.pone.0068076.g005

enhanced replication capacity in macrophages compared to the isolates circulating during the early infection [65,67].

We found that, in all primary cells, maraviroc inhibits viral replication of isolates not only with pure R5 tropism but also with dual/mixed tropism (mainly R5<sup>+</sup>/X4 and also to a lesser extent R5/X4 and R5/X4<sup>+</sup>) suggesting that CCR5-inhibitors are highly effective against all viruses with these dual-characteristics. This observation can be explained by a recent study showing a functional interaction of CCR5 and CXCR4 co-receptors in lymphocytes and monocytes, and the ability of CCR5 and CXCR4 antagonists to cross-bind both co-receptors [68].

Thus, the concept of HIV entry through one of the two coreceptors “separately” needs to be revised. Indeed, our *in vitro* results are also consistent with others obtained *in vivo*: a) from the A4001029-study, showing that maraviroc is effective also in some patients (27%) carrying dual-tropic viruses [69], b) from a recent

case-report that demonstrates the ability of maraviroc to inhibit dual-R5 viruses in a dual/mixed HIV-1-infected patient [39].

The efficiency of maraviroc to inhibit HIV-1 replication in macrophages can have important pathogenic and clinical implications, in particular by reducing the dissemination of HIV in different body compartments and cellular reservoirs. This is particularly relevant in the central nervous system where maraviroc is known to efficiently penetrate [70]. In addition, macrophages at vaginal level have been shown to be permissive to HIV infection after the virus has translocated across the epithelium [71]. The high activity of maraviroc against macrophages might also contribute in controlling mucosal HIV-1 infection in sexual-transmission.

By analysing *in vitro* activity of CXCR4-antagonist AMD3100, we found the ability of this drug to inhibit the replication of pure-X4 and also some dual/mixed-tropic viruses (in particular R5/X4<sup>+</sup> and R5/X4) in both PBMC and MDM. Again this is in line



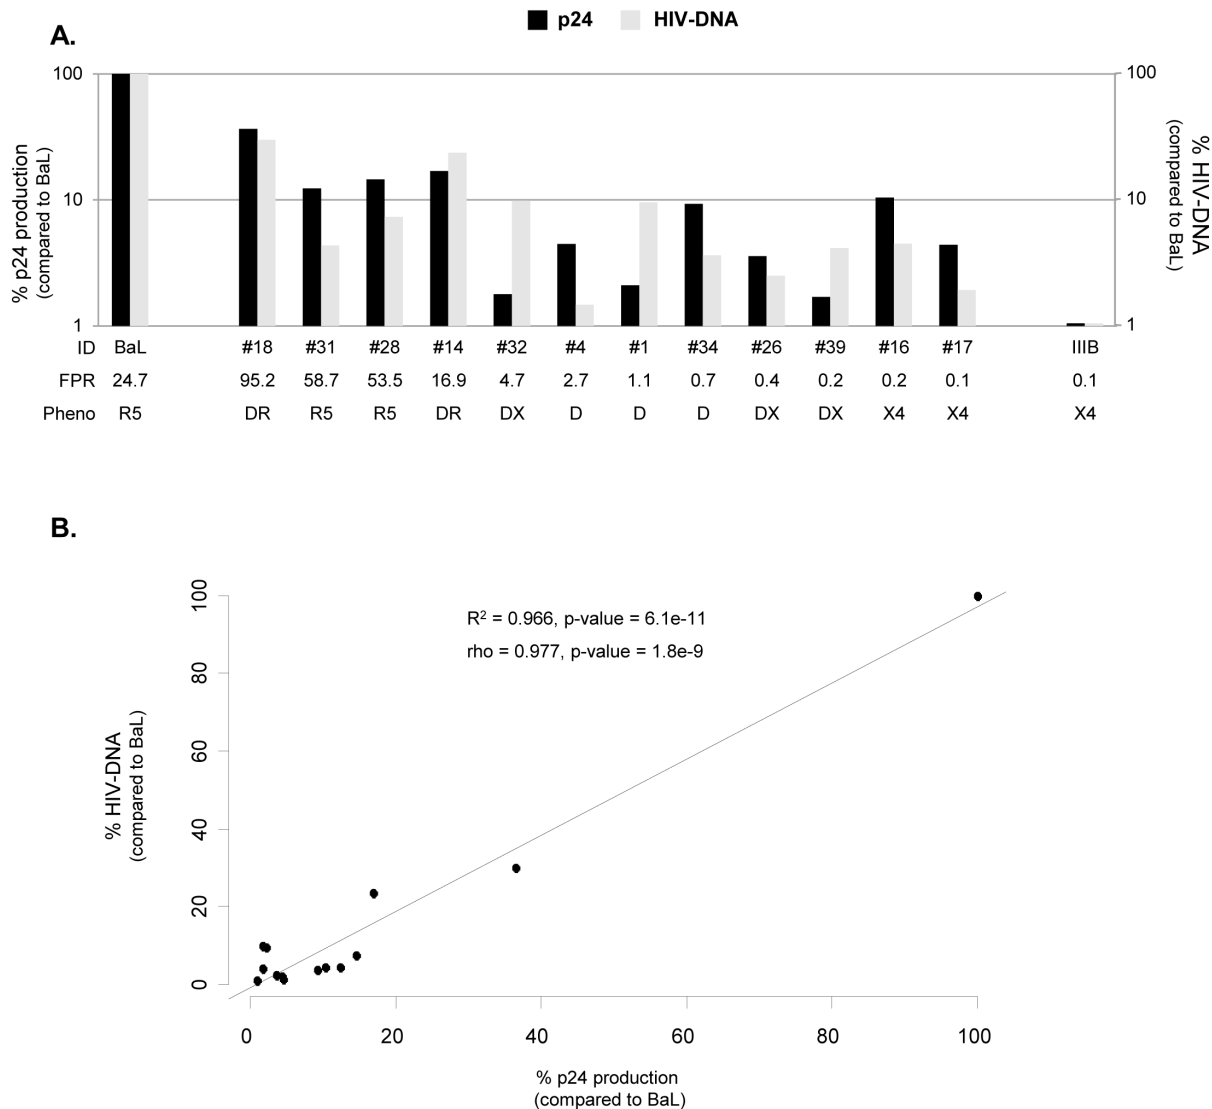

**Figure 6. Comparison of HIV-DNA and viral replication in Macrophages.** Panel A: The bars represents the percentage of HIV-1 DNA copies and p24 values (normalized per  $10^5$  cells) in human primary MDM infected with 8,000 pg per  $10^5$  cells after 14 days post infection. The percentage of p24 production and DNA copies of each isolate is calculated considering the replication of the control virus HIV<sub>BaL</sub> as 100 (median p24 production of 499.310 pg/ $10^5$  and  $9.3 \times 10^6$  HIV DNA copies/ $10^6$ ). Panel B: The scatterplot shows the correlation between the replication capacity (p24 production) and HIV-DNA content, by using a simple linear regression model. Pearson correlation coefficient was also used to determine the strength of correlation between p24 production and HIV-DNA copies.  $R^2$  = Coefficient of determination;  $\rho$  = Pearson correlation coefficient;  $p$ , two-tailed  $p$  value. The False Positive Rate (FPR) values are based on the V3 sequences and calculated with Geno2Pheno algorithm. The phenotypic tropism was evaluated on astrogloma U87MG-CD4<sup>+</sup>-CCR5<sup>+</sup>-/CXCR4<sup>+</sup>-expressing cells (DR: R5<sup>+</sup>X4; D: R5/X4; DX: R5/X4<sup>+</sup>). doi:10.1371/journal.pone.0068076.g006

with another *in vivo* study, showing the ability of AMD3100 to suppress both X4-tropic and certain dual-tropic variants, that use more efficiently the CXCR4 coreceptor than the CCR5 [72].

Overall, the genotypic tropism testing on population-based V3 sequencing, is a valid tool for tropism determination in clinical practice (as also reported by the European Guidelines 2011 [73]). Indeed, all R5 genotypically predicted viruses were responsive to maraviroc *in vitro* in primary cells. This methodology has low cost and short turnaround, and has been recently shown to adequately predict virological response to maraviroc in drug-naïve patients of the MERIT Trial [74].

Finally, to better discriminate the viral entry and viral replication, we found no main differences in PBMC and CD4<sup>+</sup> T cells by comparing the total HIV DNA copies with the p24

production in presence or absence of maraviroc. Some HIV-1 isolates not replicating in CD4<sup>+</sup> T cells, reached high levels of HIV DNA, suggesting a latency phase after HIV-1 entry. The establishment of a latent infection has been generally considered to be dependent on the cell type infected by HIV [75]. Our finding confirms the existence of potential viral mechanisms regulating the entry into a latent phase in lymphocytes. This point deserves further investigation.

In conclusion, this study underlies the existence of complexity and heterogeneity among the HIV-1 population in terms of viral tropism. Our results reinforce the concept that HIV-1 tropism is a phenomenon not only dependent on the coreceptor usage but also on the replication capacity in different cell types. The majority of isolates efficiently replicated in both PBMC and CD4<sup>+</sup> T-cells,

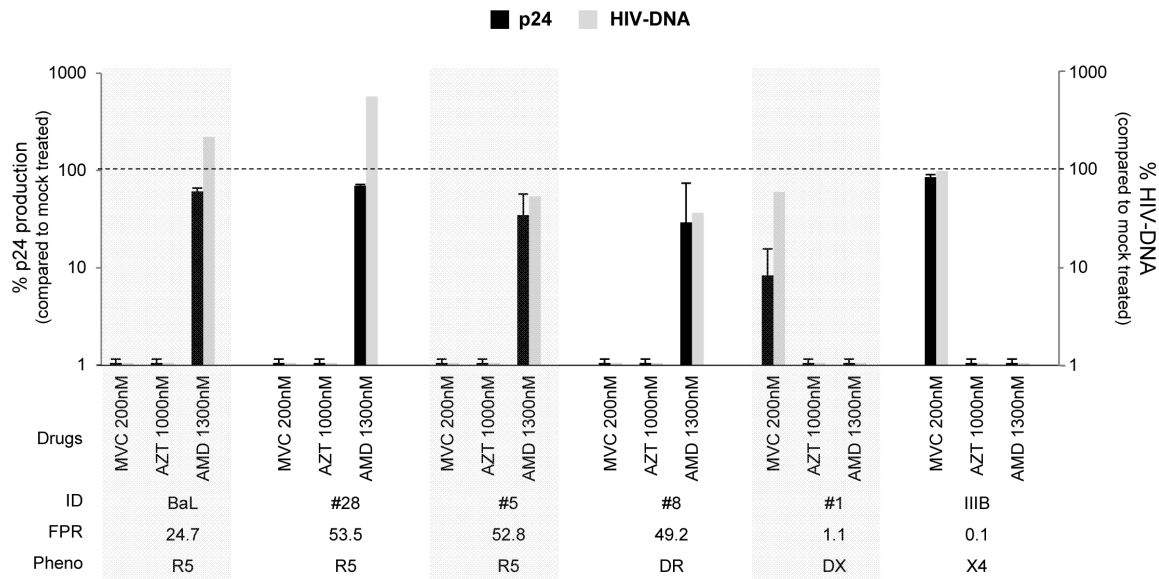

**Figure 7. Inhibition of HIV DNA in presence of maraviroc in PBMC cultures.** The bars represent the percentage of HIV-1 DNA copies and p24 values (normalized per  $10^6$  cells) in the presence of AMD, AZT and maraviroc at different concentrations considering the untreated as 100. HIV<sub>BaL</sub> is used as control virus. The p24 production is obtained from PBMC-cultures infected with 16,000 pg per  $10^6$  cells after 7 days post infection. Data represent one of three experiments yielding similar results. Mean values of 3 biological replicates (p24 production) for each isolate are shown. Error bars indicating intra-experimental standard deviations are shown. The False Positive Rate (FPR) values are based on the V3 sequences and calculated with Geno2Pheno algorithm. The phenotypic tropism was evaluated on astrogloma U87MG-CD4<sup>+</sup>-CCR5<sup>+</sup>-/CXCR4<sup>+</sup>-expressing cells (DR: R5<sup>+</sup>X4; D: R5/X4; DX: R5/X4<sup>+</sup>).

doi:10.1371/journal.pone.0068076.g007

regardless of their tropism, while macrophages mainly sustained the replication of HIV-1 isolates with pure R5 or R5<sup>+</sup>/X4 tropism. Moreover, the CCR5-antagonist maraviroc was active in both PBMC and macrophages against phenotypically pure R5 or R5<sup>+</sup>/X4 viruses, all R5 predicted by genotypic test. This supports the concept of extending the use of CCR5-antagonists to a spectrum of patients potentially larger than only those infected with a pure-R5 virus.

## Supporting Information

**Table S1** Nucleotidic V3 sequences of isolates. (DOCX)

## References

- Goodenow MM, Collman RG (2006) HIV-1 coreceptor preference is distinct from target cell tropism: a dual-parameter nomenclature to define viral phenotypes. *J Leukoc Biol* 80: 965–972. jlb.0306148 [pii]; doi:10.1189/jlb.0306148.
- Cammack N (1999) Human immunodeficiency virus type 1 entry and chemokine receptors: a new therapeutic target. *Antivir Chem Chemother* 10: 53–62.
- Feng Y, Broder CC, Kennedy PE, Berger EA (1996) HIV-1 entry cofactor: functional cDNA cloning of a seven-transmembrane, G protein-coupled receptor. *Science* 272: 872–877.
- Moore JP, Trkola A, Dragic T (1997) Co-receptors for HIV-1 entry. *Curr Opin Immunol* 9: 551–562. S0952-7915(97)80110-0 [pii].
- Dragic T, Litwin V, Allaway GP, Martin SR, Huang Y, et al. (1996) HIV-1 entry into CD4<sup>+</sup> cells is mediated by the chemokine receptor CC-CKR-5. *Nature* 381: 667–673. doi:10.1038/381667a0.
- Scarlatti G, Tresoldi E, Bjornedal A, Fredriksson R, Colognesi C, et al. (1997) In vivo evolution of HIV-1 co-receptor usage and sensitivity to chemokine-mediated suppression. *Nat Med* 3: 1259–1265.
- Trouplin V, Salvatori F, Cappello F, Obry V, Brelot A, et al. (2001) Determination of coreceptor usage of human immunodeficiency virus type 1 from patient plasma samples by using a recombinant phenotypic assay. *J Virol* 75: 251–259. doi:10.1128/JVI.75.1.251-259.2001.
- Svicher V, Balestra E, Cento V, Sarmati L, Dori L, et al. (2011) HIV-1 dual/mixed tropic isolates show different genetic and phenotypic characteristics and response to maraviroc in vitro. *Antiviral Res* 90: 42–53. S0166-3542(11)00033-7 [pii]; doi:10.1016/j.antiviral.2011.02.005.
- Berger EA, Murphy PM, Farber JM (1999) Chemokine receptors as HIV-1 coreceptors: roles in viral entry, tropism, and disease. *Annu Rev Immunol* 17: 657–700. doi:10.1146/annurev.immunol.17.1.657.
- Mammano F, Salvatori F, Ometto L, Panozzo M, Chicco-Bianchi L, et al. (1995) Relationship between the V3 loop and the phenotypes of human immunodeficiency virus type 1 (HIV-1) isolates from children perinatally infected with HIV-1. *J Virol* 69: 82–92.
- Skrabal K, Low AJ, Dong W, Sing T, Cheung PK, et al. (2007) Determining human immunodeficiency virus coreceptor use in a clinical setting: degree of correlation between two phenotypic assays and a bioinformatic model. *J Clin Microbiol* 45: 279–284. JCM.01118-06 [pii]; doi:10.1128/JCM.01118-06.
- Simon B, Grabmeier-Pfistershammer K, Rieger A, Sarletti M, Schmed B, et al. (2010) HIV coreceptor tropism in antiretroviral treatment-naive patients newly diagnosed at a late stage of HIV infection. *AIDS* 24: 2051–2058. doi:10.1097/QAD.0b013e32833c93e6.
- Keele BF, Giorgi EE, Salazar-Gonzalez JF, Decker JM, Pham KT, et al. (2008) Identification and characterization of transmitted and early founder virus

## Acknowledgments

We thank Michela Pollicita and Fernanda Scopelliti for their collaborative support in this study.

This work has been presented in part at the 9th European Workshop on HIV & Hepatitis - Treatment Strategies & Antiviral Drug Resistance, Paphos, Cyprus, 23–25 March 2011, at the 3th ICAR – Italian Conference on AIDS and Retroviruses, Florence, Italy, 27–29 March 2011, and at 6th IAS Conference on HIV Pathogenesis, Treatment and Prevention, Rome, Italy, 17–20 July, 2011.

## Author Contributions

Conceived and designed the experiments: MS EB CFP. Performed the experiments: MS EB PS FDS MM. Analyzed the data: MS EB DDC SA VS CFP FCS. Contributed reagents/materials/analysis tools: LS MA. Wrote the paper: MS EB SA VS CFP FCS. Statistical Analysis: MS DDC.

- envelopes in primary HIV-1 infection. *Proc Natl Acad Sci U S A* 105: 7552–7557. 0802203105 [pii]; doi:10.1073/pnas.0802203105.
14. Weinberger AD, Perelson AS (2011) Persistence and emergence of X4 virus in HIV infection. *Math Biosci Eng* 8: 605–626.
  15. Kamp C (2009) Understanding the HIV coreceptor switch from a dynamical perspective. *BMC Evol Biol* 9: 274. 1471-2148-9-274 [pii]; doi:10.1186/1471-2148-9-274.
  16. Saracino A, Monno L, Cibelli DC, Punzi G, Brindicci G, et al. (2009) Coreceptor switch during HAART is independent of virological success. *J Med Virol* 81: 2036–2044. doi:10.1002/jmv.21598.
  17. Gorry PR, Churchill M, Crowe SM, Cunningham AL, Gabuzda D (2005) Pathogenesis of macrophage tropic HIV-1. *Curr HIV Res* 3: 53–60.
  18. Waters L, Mandalia S, Randell P, Wildfire A, Gazzard B, et al. (2008) The impact of HIV tropism on decreases in CD4 cell count, clinical progression, and subsequent response to a first antiretroviral therapy regimen. *Clin Infect Dis* 46: 1617–1623. doi:10.1086/587660.
  19. Santoro MM, Armenia D, Fabeni L, Santoro M, Gori C, et al. (2012) The lowest X4 Geno2Pheno false-positive rate is associated with greater CD4 depletion in HIV-1 infected patients. *Clin Microbiol Infect* 18: E289–E298. doi:10.1111/j.1469-0691.2012.03905.x.
  20. Wilkin TJ, Su Z, Kuritzkes DR, Hughes M, Flexner C, et al. (2007) HIV type 1 chemokine coreceptor use among antiretroviral-experienced patients screened for a clinical trial of a CCR5 inhibitor: AIDS Clinical Trial Group A5211. *Clin Infect Dis* 44: 591–595. CID40439 [pii]; doi:10.1086/511035.
  21. Melby T, Despirito M, Demasi R, Heilek-Snyder G, Greenberg ML, et al. (2006) HIV-1 coreceptor use in triple-class treatment-experienced patients: baseline prevalence, correlates, and relationship to enfuvirtide response. *J Infect Dis* 194: 238–246. JID36223 [pii]; doi:10.1086/504693.
  22. Moyle GJ, Wildfire A, Mandalia S, Mayer H, Goodrich J, et al. (2005) Epidemiology and predictive factors for chemokine receptor use in HIV-1 infection. *J Infect Dis* 191: 866–872. JID33384 [pii]; doi:10.1086/428096.
  23. Brumme ZL, Goodrich J, Mayer HB, Brumme CJ, Henrick BM, et al. (2005) Molecular and clinical epidemiology of CXCR4-using HIV-1 in a large population of antiretroviral-naive individuals. *J Infect Dis* 192: 466–474. JID34006 [pii]; doi:10.1086/431519.
  24. Svicher V, D'Arrigo R, Alteri C, Andreoni M, Angarano G, et al. (2010) Performance of genotypic tropism testing in clinical practice using the enhanced sensitivity version of Trofile as reference assay: results from the OSCAR Study Group. *New Microbiol* 33: 195–206.
  25. Chueca N, Garrido C, Alvarez M, Poveda E, de Dios LJ, et al. (2009) Improvement in the determination of HIV-1 tropism using the V3 gene sequence and a combination of bioinformatic tools. *J Med Virol* 81: 763–767. doi:10.1002/jmv.21425.
  26. Poveda E, Seclen E, Gonzalez MM, Garcia F, Chueca N, et al. (2009) Design and validation of new genotypic tools for easy and reliable estimation of HIV tropism before using CCR5 antagonists. *J Antimicrob Chemother* 63: 1006–1010. dkp063 [pii]; doi:10.1093/jac/dkp063.
  27. Prosperi MC, Bracciale L, Fabbiani M, Di GS, Razzolini F, et al. (2010) Comparative determination of HIV-1 co-receptor tropism by Enhanced Sensitivity Trofile, gp120 V3-loop RNA and DNA genotyping. *Retrovirology* 7: 56. 1742-4690-7-56 [pii]; doi:10.1186/1742-4690-7-56.
  28. Swenson LC, Mo T, Dong WW, Zhong X, Woods CK, et al. (2011) Deep V3 sequencing for HIV type 1 tropism in treatment-naive patients: a reanalysis of the MERIT trial of maraviroc. *Clin Infect Dis* 53: 732–742. cir493 [pii]; doi:10.1093/cid/cir493.
  29. Swenson LC, Daumer M, Paredes R (2012) Next-generation sequencing to assess HIV tropism. *Curr Opin HIV AIDS*. doi:10.1097/COH.0b013e3283356e9da.
  30. Rozera G, Abbate I, Ciccozzi M, Lo PA, Bruselles A, et al. (2012) Ultra-deep sequencing reveals hidden HIV-1 minority lineages and shifts of viral population between the main cellular reservoirs of the infection after therapy interruption. *J Med Virol* 84: 839–844. doi:10.1002/jmv.23292.
  31. Dorr P, Westby M, Dobbs S, Griffin P, Irvine B, et al. (2005) Maraviroc (UK-427,857), a potent, orally bioavailable, and selective small-molecule inhibitor of chemokine receptor CCR5 with broad-spectrum anti-human immunodeficiency virus type 1 activity. *Antimicrob Agents Chemother* 49: 4721–4732. 49/11/4721 [pii]; doi:10.1128/AAC.49.11.4721-4732.2005.
  32. Gulick RM, Lalezari J, Goodrich J, Clumeck N, Dejesus E, et al. (2008) Maraviroc for previously treated patients with R5 HIV-1 infection. *N Engl J Med* 359: 1429–1441. 359/14/1429 [pii]; doi:10.1056/NEJMoa0803152.
  33. Fatkenheuer G, Nelson M, Lazzarin A, Konourina I, Hoepelman AI, et al. (2008) Subgroup analyses of maraviroc in previously treated R5 HIV-1 infection. *N Engl J Med* 359: 1442–1455. 359/14/1442 [pii]; doi:10.1056/NEJMoa0803154.
  34. Cooper DA, Heera J, Goodrich J, Tawadrous M, Saag M, et al. (2010) Maraviroc versus efavirenz, both in combination with zidovudine-lamivudine, for the treatment of antiretroviral-naive subjects with CCR5-tropic HIV-1 infection. *J Infect Dis* 201: 803–813. doi:10.1086/650697.
  35. Fatkenheuer G, Pozniak AL, Johnson MA, Plettenberg A, Staszewski S, et al. (2005) Efficacy of short-term monotherapy with maraviroc, a new CCR5 antagonist, in patients infected with HIV-1. *Nat Med* 11: 1170–1172. nm1319 [pii]; doi:10.1038/nm1319.
  36. Moore JP, Kuritzkes DR (2009) A piece de resistance: how HIV-1 escapes small molecule CCR5 inhibitors. *Curr Opin HIV AIDS* 4: 118–124. 01222929-200903000-00008 [pii]. doi:10.1097/COH.0b013e3283232d46.
  37. Loftin LM, Kienle M, Yi Y, Collman RG (2011) R5X4 HIV-1 coreceptor use in primary target cells: implications for coreceptor entry blocking strategies. *J Transl Med* 9 Suppl 1: S3. 1479-5876-9-S1-S3 [pii]; doi:10.1186/1479-5876-9-S1-S3.
  38. Toma J, Whitcomb JM, Petropoulos CJ, Huang W (2010) Dual-tropic HIV type 1 isolates vary dramatically in their utilization of CCR5 and CXCR4 coreceptors. *AIDS* 24: 2181–2186. doi:10.1097/QAD.0b013e32833c543f.
  39. Symons J, van Lelyveld SF, Hoepelman AI, van Ham PM, de JD, et al. (2011) Maraviroc is able to inhibit dual-R5 viruses in a dual/mixed HIV-1-infected patient. *J Antimicrob Chemother* 66: 890–895. dkq535 [pii]; doi:10.1093/jac/dkq535.
  40. Schweighardt B, Roy AM, Meiklejohn DA, Grace EJ, Moretto WJ, et al. (2004) R5 human immunodeficiency virus type 1 (HIV-1) replicates more efficiently in primary CD4+ T-cell cultures than X4 HIV-1. *J Virol* 78: 9164–9173. 78/17/9164 [pii]. doi:10.1128/JVI.78.17.9164-9173.2004.
  41. Zack JA, Arrigo SJ, Weitsman SR, Go AS, Haislip A, et al. (1990) HIV-1 entry into quiescent primary lymphocytes: molecular analysis reveals a labile, latent viral structure. *Cell* 61: 213–222. 0092-8674(90)90802-L [pii].
  42. Balestra E, Perno CF, Aquaro S, Panti S, Bertoli A, et al. (2001) Macrophages: a crucial reservoir for human immunodeficiency virus in the body. *J Biol Regul Homeost Agents* 15: 272–276.
  43. Naif HM, Cunningham AL, Alali M, Li S, Nasr N, et al. (2002) A human immunodeficiency virus type 1 isolate from an infected person homozygous for CCR5Delta32 exhibits dual tropism by infecting macrophages and MT2 cells via CXCR4. *J Virol* 76: 3114–3124.
  44. Coiras M, Lopez-Huertas MR, Perez-Olmeda M, Alami J (2009) Understanding HIV-1 latency provides clues for the eradication of long-term reservoirs. *Nat Rev Microbiol* 7: 798–812. nrmicro2223 [pii]; doi:10.1038/nrmicro2223.
  45. Cassol E, Alfano M, Biswas P, Poli G (2006) Monocyte-derived macrophages and myeloid cell lines as targets of HIV-1 replication and persistence. *J Leukoc Biol* 80: 1018–1030. jlb.0306150 [pii]; doi:10.1189/jlb.0306150.
  46. Aquaro S, Bagnarelli P, Guenci T, De LA, Clementi M, et al. (2002) Long-term survival and virus production in human primary macrophages infected by human immunodeficiency virus. *J Med Virol* 68: 479–488. doi:10.1002/jmv.10245.
  47. Koppensteiner H, Brack-Werner R, Schindler M (2012) Macrophages and their relevance in Human Immunodeficiency Virus Type I infection. *Retrovirology* 9: 82. 1742-4690-9-82 [pii]; doi:10.1186/1742-4690-9-82.
  48. Orenstein JM, Fox C, Wahl SM (1997) Macrophages as a source of HIV during opportunistic infections. *Science* 276: 1857–1861.
  49. Coiras M, Lopez-Huertas MR, Alami J (2010) HIV-1 latency and eradication of long-term viral reservoirs. *Discov Med* 9: 185–191.
  50. Swingler S, Mann A, Jacque J, Brichacek B, Sasseville VG, et al. (1999) HIV-1 Nef mediates lymphocyte chemotaxis and activation by infected macrophages. *Nat Med* 5: 997–1003. doi:10.1038/12433.
  51. Duncan CJ, Sattentau QJ (2011) Viral determinants of HIV-1 macrophage tropism. *Viruses* 3: 2255–2279. viruses-03-02255 [pii]. doi:10.3390/v3112255.
  52. Bjornstal A, Deng H, Jansson M, Fiore JR, Colognesi C, et al. (1997) Coreceptor usage of primary human immunodeficiency virus type 1 isolates varies according to biological phenotype. *J Virol* 71: 7478–7487.
  53. Ponten J, Macintyre EH (1968) Long term culture of normal and neoplastic human glioma. *Acta Pathol Microbiol Scand* 74: 465–486.
  54. Perno CF, Yarchoan R, Cooney DA, Hartman NR, Gartner S, et al. (1988) Inhibition of human immunodeficiency virus (HIV-1)/HTLV-IIIb(L) replication in fresh and cultured human peripheral blood monocytes/macrophages by azidothymidine and related 2',3'-dideoxynucleosides. *J Exp Med* 168: 1111–1125.
  55. Perno CF, Aquaro S, Rosenwirth B, Balestra E, Peichl P, et al. (1994) In vitro activity of inhibitors of late stages of the replication of HIV in chronically infected macrophages. *J Leukoc Biol* 56: 381–386.
  56. Nicastrì E, Sarmati L, Dori L, Montano M, d'Ettorre G, et al. (2004) Viral growth assay to evaluate the replicative capacity of HIV-1 isolates. *J Virol Methods* 115: 199–205. S016609340300315X [pii].
  57. Andreoni M, Parisi SG, Sarmati L, Nicastrì E, Ercoli L, et al. (2000) Cellular proviral HIV-DNA decline and viral isolation in naive subjects with <5000 copies/ml of HIV-RNA and >500×10<sup>6</sup>/1 CD4 cells treated with highly active antiretroviral therapy. *AIDS* 14: 23–29.
  58. Uryu T, Ikushima N, Katsuraya K, Shoji T, Takahashi N, et al. (1992) Sulfated alkyl oligosaccharides with potent inhibitory effects on human immunodeficiency virus infection. *Biochem Pharmacol* 43: 2385–2392. 0006-2952(92)90317-C [pii].
  59. De CE, Yamamoto N, Pauwels R, Balzarini J, Witvrouw M, et al. (1994) Highly potent and selective inhibition of human immunodeficiency virus by the bicyclam derivative JM3100. *Antimicrob Agents Chemother* 38: 668–674.
  60. Viard JP, Burgard M, Hubert JB, Aaron L, Rabian C, et al. (2004) Impact of 5 years of maximally successful highly active antiretroviral therapy on CD4 cell count and HIV-1 DNA level. *AIDS* 18: 45–49. 00002030-200401020-00005 [pii].
  61. Folks TM, Powell D, Lightfoote M, Koenig S, Fauci AS, et al. (1986) Biological and biochemical characterization of a cloned Leu-3- cell surviving infection with the acquired immune deficiency syndrome retrovirus. *J Exp Med* 164: 280–290.

62. Hart C, Chang SY, Kwok S, Sninsky J, Ou CY, et al. (1990) A replication-deficient HIV-1 DNA used for quantitation of the polymerase chain reaction (PCR). *Nucleic Acids Res* 18: 4029–4030.
63. R Foundation for Statistical Computing VA (2012) R Core Team. R: A language and environment for statistical computing., version.
64. Church JD, Huang W, Mwatha A, Toma J, Stawiski E, et al. (2008) HIV-1 tropism and survival in vertically infected Ugandan infants. *J Infect Dis* 197: 1382–1388. doi:10.1086/587492.
65. Li S, Juarez J, Alali M, Dwyer D, Collman R, et al. (1999) Persistent CCR5 utilization and enhanced macrophage tropism by primary blood human immunodeficiency virus type 1 isolates from advanced stages of disease and comparison to tissue-derived isolates. *J Virol* 73: 9741–9755.
66. Gorry PR, Bristol G, Zack JA, Ritola K, Swanstrom R, et al. (2001) Macrophage tropism of human immunodeficiency virus type 1 isolates from brain and lymphoid tissues predicts neurotropism independent of coreceptor specificity. *J Virol* 75: 10073–10089. doi:10.1128/JVI.75.21.10073-10089.2001.
67. Tuttle DL, Anders CB, Aquino-De Jesus MJ, Poole PP, et al. (2002) Increased replication of non-syncytium-inducing HIV type 1 isolates in monocyte-derived macrophages is linked to advanced disease in infected children. *AIDS Res Hum Retroviruses* 18: 353–362. doi:10.1089/088922202753519133.
68. Sohy D, Yano H, de NP, Urizar E, Guillaubert A, et al. (2009) Hetero-oligomerization of CCR2, CCR5, and CXCR4 and the protean effects of “selective” antagonists. *J Biol Chem* 284: 31270–31279. M109.054809 [pii]; doi:10.1074/jbc.M109.054809.
69. Saag M, Goodrich J, Fatkenheuer G, Clotet B, Clumeck N, et al. (2009) A double-blind, placebo-controlled trial of maraviroc in treatment-experienced patients infected with non-R5 HIV-1. *J Infect Dis* 199: 1638–1647. doi:10.1086/598965.
70. Yilmaz A, Watson V, Else L, Gisslen M (2009) Cerebrospinal fluid maraviroc concentrations in HIV-1 infected patients. *AIDS* 23: 2537–2540. doi:10.1097/QAD.0b013e328333ac0e.
71. Shen R, Richter HE, Clements RH, Novak L, Huff K, et al. (2009) Macrophages in vaginal but not intestinal mucosa are monocyte-like and permissive to human immunodeficiency virus type 1 infection. *J Virol* 83: 3258–3267. JVI.01796-08 [pii]; doi:10.1128/JVI.01796-08.
72. Fransen S, Bridger G, Whitcomb JM, Toma J, Stawiski E, et al. (2008) Suppression of dualtropic human immunodeficiency virus type 1 by the CXCR4 antagonist AMD3100 is associated with efficiency of CXCR4 use and baseline virus composition. *Antimicrob Agents Chemother* 52: 2608–2615. AAC.01226-07 [pii]; doi:10.1128/AAC.01226-07.
73. Vandekerckhove LP, Wensing AM, Kaiser R, Brun-Vezinet F, Clotet B, et al. (2011) European guidelines on the clinical management of HIV-1 tropism testing. *Lancet Infect Dis* 11: 394–407. S1473-3099(10)70319-4 [pii]; doi:10.1016/S1473-3099(10)70319-4.
74. McGovern RA, Thielen A, Portsmouth S, Mo T, Dong W, et al. (2012) Population-based Sequencing of the V3-loop can Predict the Virological Response to Maraviroc in Treatment-naive Patients of the MERIT Trial. *J Acquir Immune Defic Syndr*. doi:10.1097/QAI.0b013e31826249cf.
75. Lewin SR, Evans VA, Elliott JH, Spire B, Chomont N (2011) Finding a cure for HIV: will it ever be achievable? *J Int AIDS Soc* 14: 4. 1758-2652-14-4 [pii]; doi:10.1186/1758-2652-14-4.
